# Supplementary material for: CT acquisition parameter selection in the real world: impacts on radiation dose and variation amongst 155 institutions
Source: Springer Nature journal article supplement (doi:10.1007/s00330-023-10161-w), 2023-08-30

Table A1 – Impact of changes in the CT acquisition parameters on the dose length product, based on percent increases equivalent to one geometric standard deviation increase of each CT acquisition parameters

|                                                                                         | kV   | mAs | (Inverse)<br>Spiral<br>Pitch | Number<br>of<br>Phases | Scan<br>Length<br>(mm) |
|-----------------------------------------------------------------------------------------|------|-----|------------------------------|------------------------|------------------------|
| DLP Increase per 7% (kV gSD)<br>Increase in acquisition parameter                       | 20%  | 6%  | 6%                           | 6%                     | 4%                     |
| DLP Increase per 70% (mAs gSD)<br>Increase in acquisition parameter                     | 315% | 64% | 54%                          | 55%                    | 31%                    |
| DLP Increase per 28% (inverse spiral<br>pitch gSD) Increase in acquisition<br>parameter | 94%  | 26% | 22%                          | 23%                    | 14%                    |
| DLP Increase per 57% (number of<br>phases gSD) Increase in acquisition<br>parameter     | 235% | 52% | 44%                          | 45%                    | 26%                    |
| DLP Increase per 52% (scan length<br>gSD) Increase in acquisition parameter             | 207% | 47% | 41%                          | 41%                    | 24%                    |

Figure A1 – Distribution of observed dose-length product (mGy-cm), compared to dose-length product, as estimated by our regression model

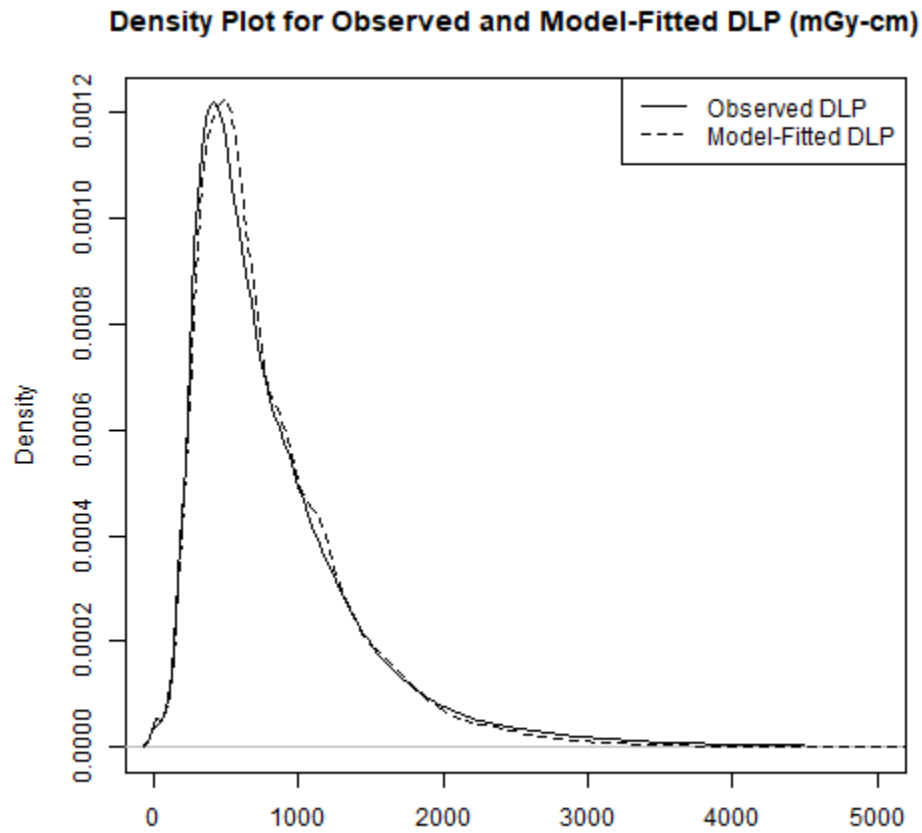

Supplement: MOESM1 [file 25980786]
